# Supplementary material for: What effort is required in retrieving self-defining memories? Specific autonomic responses for integrative and non-integrative memories
Source: PubMed Central journal article supplement (PMC6894867; doi:10.1371/journal.pone.0226009), 2019-12-05
Supplement: pone.0226009.s001.pdf [file pone.0226009.s001.pdf]

Audrey Lavallée  
Pr Thierry Pham  
Pr Jean-Louis Nandrino  
Equipe Dynamique Émotionnelle et Pathologie  
Laboratoire SCALab UMR CNR S 9193  
Université de Lille

Partie à compléter par l'expérimentateur :

T° : *Celsius*                      Heure :

Date :

Code Participant :

1. Age :            ans
2. Poids :            kg
3. Taille :            cm
4. Sexe : Homme       Femme
5. Heure du réveil :
6. Fumeur : oui  non
7. Situation familiale :  
Célibataire     En couple     Séparé / Divorcé     Veuvage
8. Nombre d'enfant :
9. Niveau d'étude :
10. Situation professionnelle  
Salarié\_CDI     Salarié\_CDD     Sans-emploi/chômage   
Au foyer     Etudiant     Invalide/AAH/ Longue maladie
11. Etes-vous : Droitier       Gaucher
12. Etes-vous, avez-vous déjà été sujet à des troubles neurologiques (AVC ; épilepsie ...) ? .....
13. Etes-vous, avez-vous déjà été sujet à des troubles psychiatriques ? .....
14. Suivez-vous actuellement un traitement ? .....
- Si oui, le(s)quel(s) ?  
.....  
.....
15. Si vous êtes une femme, prenez-vous des hormones contraceptives ? .....
- Pouvez-vous nous indiquer la période du cycle menstruel dans laquelle vous vous trouvez ?  
.....

Audrey Lavallée  
Pr Thierry Pham  
Pr Jean-Louis Nandrino  
Team Dynamique Émotionnelle et Pathologie  
Laboratory SCALab UMR CNRS 9193  
University of Lille

To be fulfilled by the investigator:

Temperature:      *Celsius*                      Hour :

Date:

Participant code:

1. Age:            years
2. Weight:                      kg
3. Height:                      cm
4. Sex : Man       Woman
5. Wake-up time today:
6. Smoker: Yes  No
7. Family status :  
Single     Couple     Separated/Divorced     Widow(er)
8. Number of children:
9. What is your education level:
10. Professional status :  
Permanent contract employee     Fixed-term contract employee     Unemployed   
Homemaker     Student     Invalid/Handicap
11. You are: Right-handed  Left-handed
12. Have you ever had any neurological disorders (stroke; epilepsy ...)? .....
13. Have you ever had any psychiatric disorders? .....
14. Are you currently under treatment/on medication? .....
- If yes, which one(s)?  
.....  
.....
15. If you are a woman, are you taking contraceptive hormones? .....
- Could you indicate what period of of the menstrual cycle you are in?  
.....
